# Supplementary material for: Flavor and texture characteristics of microwave-cooked Kung Pao Chicken by different heat conduction effects and further aroma improvement with moderate enzymatic hydrolyzed chicken fat
Source: Royal Society of Chemistry journal article supplement (doi:10.1039/d0fo02726j), 2020-12-29
Supplement: d0fo02726j1.pdf [file d0fo02726j1.pdf]

**Flavor and Texture Characteristics of Microwave Cooked Kung Pao Chicken by Different Heat Conduction and Further Aroma Improvement through Moderate Enzymatic Hydrolyzed Chicken Fat**

Supplementary data

**Figure Captions**

**Fig. S1** Temperature curves of microwave cooked chicken at different microwave power in the ceramic dish (a), the microwave absorption dish (b) and the optimal microwave cooking processes (c)

**Fig. S1**

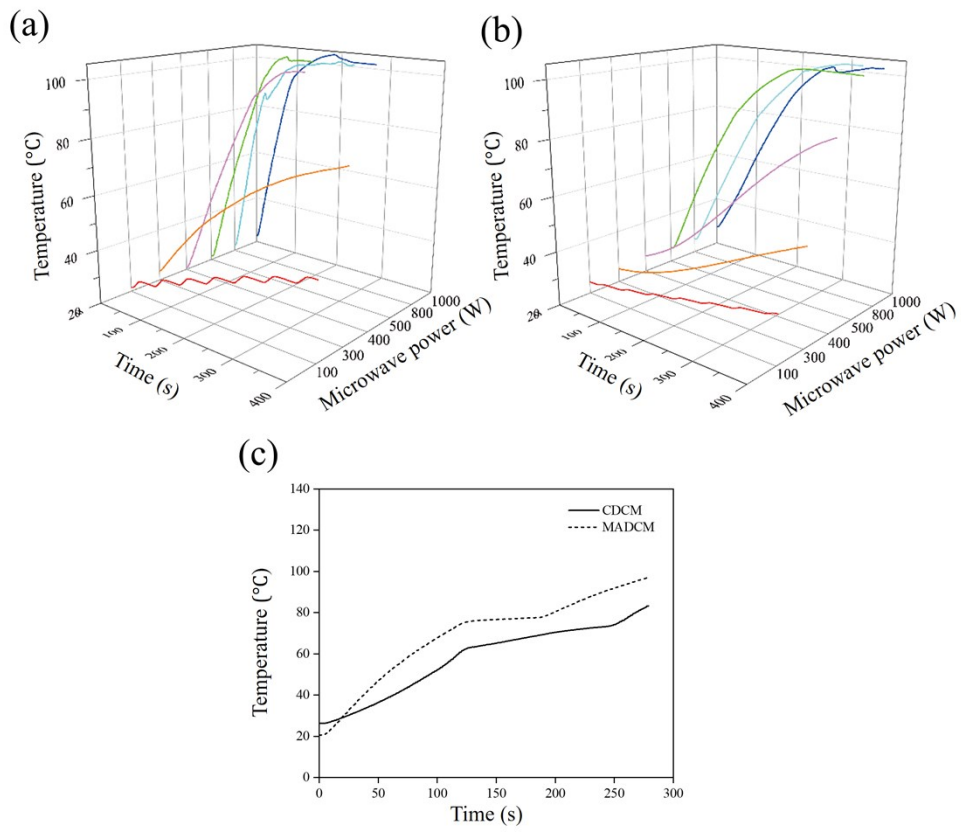

**Table S1** Sensory evaluation standards of Kung Pao Chicken

| Item                     | Scoring Criteria                                                                                    | Score |
|--------------------------|-----------------------------------------------------------------------------------------------------|-------|
| Color<br>(25 points)     | Uniform color, clear ingredients, brown red chicken                                                 | 20-25 |
|                          | Uneven color, clear ingredients, lighter or darker chicken                                          | 15-20 |
|                          | Uneven color, unclear raw materials, light or dark color of chicken                                 | 10-15 |
| Fragrance<br>(25 points) | Rich aroma                                                                                          | 20-25 |
|                          | General aroma                                                                                       | 15-20 |
|                          | Very light aroma or no scent                                                                        | 10-15 |
| Taste<br>(25 points)     | Salty, fresh, sweet, sour, slightly spicy, soft and delicious                                       | 20-25 |
|                          | One or more of the salty, sweet and sour tastes are too prominent,<br>not soft enough and delicious | 15-20 |
|                          | Without any prominent taste                                                                         | 10-15 |
| Texture<br>(25 points)   | Chicken tender and peanut crisp                                                                     | 20-25 |
|                          | Chicken is tender, but peanuts are not crispy                                                       | 15-20 |
|                          | Chicken is tough and peanuts are soft                                                               | 10-15 |

**Table S2** Relaxation time and distribution of water of Kung Pao Chicken in different cooking methods

| Relaxation peak | CDCM                |                | MADCM               |                | TCM                 |                |
|-----------------|---------------------|----------------|---------------------|----------------|---------------------|----------------|
|                 | Relaxation time (s) | Proportion (%) | Relaxation time (s) | Proportion (%) | Relaxation time (s) | Proportion (%) |
| $T_{21}$        | 0.34                | 2.17±0.01      | 0.37                | 2.75±0.01      | 0.21                | 3.69±0.02      |
| $T_{22}$        | 11.10               | 96.28±0.15     | 11.90               | 94.87±0.14     | 14.65               | 93.26±0.12     |
| $T_{23}$        | 117.58              | 1.54±0.00      | 144.81              | 2.38±0.02      | 178.34              | 3.05±0.02      |

**Table S3** Relative concentration of major volatile compounds in the samples of MCKPC in CDCM with different oil combination and amount

| Volatile compounds     | Relative concentration of major volatile compounds ( $\mu\text{g}/100 \text{ g}$ ). |                                |                               |                               |                               |                                |                                |                               |                                |                                |
|------------------------|-------------------------------------------------------------------------------------|--------------------------------|-------------------------------|-------------------------------|-------------------------------|--------------------------------|--------------------------------|-------------------------------|--------------------------------|--------------------------------|
|                        | MC0                                                                                 | MC1                            | MC2                           | MC3                           | MC4                           | MC5                            | MC6                            | MC7                           | MC8                            | MC9                            |
| Hexanal                | 41.57 $\pm$ 3.44 <sup>ab</sup>                                                      | 45.78 $\pm$ 0.65 <sup>bc</sup> | 58.66 $\pm$ 1.66 <sup>d</sup> | 31.53 $\pm$ 0.89 <sup>a</sup> | 64.77 $\pm$ 3.66 <sup>d</sup> | 54.81 $\pm$ 3.88 <sup>cd</sup> | 172.56 $\pm$ 4.88 <sup>e</sup> | 81.16 $\pm$ 5.74 <sup>e</sup> | 153.13 $\pm$ 9.83 <sup>f</sup> | 198.19 $\pm$ 5.61 <sup>h</sup> |
| Heptanal               | 4.65 $\pm$ 0.33 <sup>a</sup>                                                        | ND                             | ND                            | ND                            | ND                            | 3.95 $\pm$ 0.11 <sup>a</sup>   | 19.08 $\pm$ 1.35 <sup>b</sup>  | 3.79 $\pm$ 0.11 <sup>a</sup>  | 16.24 $\pm$ 0.46 <sup>c</sup>  | 27.74 $\pm$ 1.96 <sup>d</sup>  |
| Nonanal                | 24.58 $\pm$ 1.04 <sup>b</sup>                                                       | 29.86 $\pm$ 2.11 <sup>cd</sup> | 15.03 $\pm$ 1.06 <sup>a</sup> | 31.79 $\pm$ 0.90 <sup>d</sup> | 15.43 $\pm$ 0.44 <sup>a</sup> | 14.93 $\pm$ 0.21 <sup>a</sup>  | 56.72 $\pm$ 1.60 <sup>g</sup>  | 28.01 $\pm$ 1.58 <sup>c</sup> | 38.28 $\pm$ 1.08 <sup>e</sup>  | 45.78 $\pm$ 0.65 <sup>f</sup>  |
| ( <i>E</i> )-2-Octenal | 2.22 $\pm$ 0.06 <sup>b</sup>                                                        | 2.58 $\pm$ 0.07 <sup>b</sup>   | 2.55 $\pm$ 0.18 <sup>b</sup>  | 4.26 $\pm$ 0.30 <sup>d</sup>  | 0.89 $\pm$ 0.06 <sup>a</sup>  | 3.43 $\pm$ 0.19 <sup>c</sup>   | 4.55 $\pm$ 0.32 <sup>d</sup>   | 3.4 $\pm$ 0.10 <sup>c</sup>   | 7.66 $\pm$ 0.54 <sup>e</sup>   | 8.22 $\pm$ 0.23 <sup>f</sup>   |
| ( <i>E</i> )-2-Nonenal | ND                                                                                  | ND                             | ND                            | ND                            | 1.7 $\pm$ 0.02 <sup>a</sup>   | ND                             | ND                             | 2.01 $\pm$ 0.03 <sup>b</sup>  | 2.67 $\pm$ 0.08 <sup>c</sup>   | 3.42 $\pm$ 0.15 <sup>d</sup>   |
| ( <i>E</i> )-2-Decenal | ND                                                                                  | ND                             | ND                            | ND                            | ND                            | 2.8 $\pm$ 0.08 <sup>a</sup>    | 4.8 $\pm$ 0.07 <sup>c</sup>    | ND                            | 3.95 $\pm$ 0.28 <sup>b</sup>   | 5.94 $\pm$ 0.08 <sup>d</sup>   |
| 2,4-Decadienal         | ND                                                                                  | ND                             | ND                            | ND                            | 0.62 $\pm$ 0.04 <sup>ab</sup> | 2.46 $\pm$ 0.03 <sup>f</sup>   | 1.52 $\pm$ 0.11 <sup>c</sup>   | 0.7 $\pm$ 0.05 <sup>b</sup>   | 0.58 $\pm$ 0.02 <sup>a</sup>   | 1.71 $\pm$ 0.05 <sup>d</sup>   |
| 1-Octen-3-ol           | 17.1 $\pm$ 0.24 <sup>c</sup>                                                        | 12.5 $\pm$ 0.53 <sup>c</sup>   | 15.2 $\pm$ 0.43 <sup>d</sup>  | 9.4 $\pm$ 0.13 <sup>ab</sup>  | 10 $\pm$ 0.28 <sup>ab</sup>   | 8.3 $\pm$ 0.59 <sup>a</sup>    | 23.4 $\pm$ 1.65 <sup>g</sup>   | 10.7 $\pm$ 0.30 <sup>b</sup>  | 21 $\pm$ 0.59 <sup>f</sup>     | 29.8 $\pm$ 1.26 <sup>h</sup>   |

The means in a row with different letters were significantly different ( $p < 0.05$ ); ND: not detected.
